# Supplementary material for: Revisiting the Twin Deficit Hypothesis in South Asia: Investigating the Role of the Crowding-Out Effect and Capital Flow Dynamics
Source: Research Square preprint supplement (doi:10.21203/rs.3.rs-7488478/v1), 2025-09-11
Supplement: Supplementary file 1 [file 6a68c52c3320fa561fa8f295.docx]

**Revisiting the Twin Deficit Hypothesis in South Asia: Investigating the Role of the Crowding-Out Effect and Capital Flow Dynamics**

#### **Table 3.1: Summary of Key Variables**

| **Variable Type** | **Variable Name** | **Description** | **Unit / Transformation** |
| --- | --- | --- | --- |
| Dependent | CAB (% GDP) | Current Account Balance | Ratio to GDP |
| Main Independent | Fiscal Proxy | Debt service per capita | USD; FiscalProxy = DebtService / Population |
| Control | Remittances (% GDP) | Personal remittances received | Ratio to GDP; log-transformed |
| Control | FDI Inflows (% GDP) | Net foreign direct investment | Ratio to GDP |
| Control | Trade Balance (% GDP) | Exports – Imports | Ratio to GDP |
| Control | GDP per capita | Economic development indicator | USD; log-transformed |
| Structural Dummy | Crisis2008 | Global financial crisis indicator | Dummy (2008 = 1, else = 0) |
| Structural Dummy | Covid2020 | COVID-19 pandemic indicator | Dummy (2020 = 1, else = 0) |

**Table 3.2. Summary of Main Variables and Stationarity Properties**

| **Variable** | **Description** | **Transformation** | **Integration Order** | **Stationarity** |
| --- | --- | --- | --- | --- |
| **CAB (% of GDP)** | Current account balance | Level, then diff | I(1) | Non-stationary in levels |
| **Fiscal Proxy (USD)** | Debt service per capita | Log-transformed | I(1) | Non-stationary |
| **Remittances (% of GDP)** | Workers’ remittance inflows | First-differenced | I(1) | Borderline |
| **FDI Inflows (% of GDP)** | Net FDI inflow | Log-transformed | I(1) | Non-stationary |
| **GDP per capita (USD)** | GDP divided by population | Log-level | I(0) in some units | Mixed |
| **Trade Balance (% of GDP)** | Exports – Imports | Level | I(1) | Non-stationary |
| **Crisis Dummy 2008** | Global Financial Crisis = 1 | Dummy variable | I(0) | Stationary |
| **Crisis Dummy 2020** | COVID-19 shock = 1 | Dummy variable | I(0) | Stationary |

#### **Table 3.3: Summary of IPS Panel Unit Root Test Results**

| **Variable** | **Level Stationarity** | **First Difference Stationarity** | **W-t-bar Stat** | **p-value** |
| --- | --- | --- | --- | --- |
| Current Account Balance (% GDP) | No | Yes | –4.62 | 0.000*** |
| Remittances (% GDP) | No | No | 0.80 | 0.787 |
| FDI Inflows (% GDP) | No | Yes | –3.95 | 0.001*** |
| Fiscal Proxy (Debt per capita) | No | Yes | –2.78 | 0.006*** |
| GDP per capita (USD) | Mixed | — | –1.92 | 0.055 |
| Trade Balance (% GDP) | Mixed | — | –2.13 | 0.034** |

Note: Asterisks denote significance levels at 1% (**), 5% (**), and 10% ().

**Table 3.4 : Variable with expected effect**

| **Variable** | **Definition** | **Measurement** | **Expected Effect** |
| --- | --- | --- | --- |
| CAB | Current account balance | % of GDP | Dependent variable |
| FS | Fiscal stance (Debt service per capita) | USD per capita | Likely negative |
| FDI | Foreign direct investment inflows | % of GDP | Positive |
| Remit | Workers’ remittances received | % of GDP | Positive |
| TradeBal | Trade balance | % of GDP | Positive |
| GDPpc | GDP per capita | Constant USD | Control |
| D_2008 | Dummy for global financial crisis | Binary (0/1) | Interaction |
| D_Covid | Dummy for COVID-19 pandemic | Binary (0/1) | Interaction |
| FS×D_FS | Interaction term: fiscal variable × crisis indicator | Interaction effect | Varies |

### **Table 4.1: Summary Statistics for South Asian Countries (1990-2023)**

| **Variable** | **Mean** | **Median** | **SD** | **Min** | **Max** | **Observations** |
| --- | --- | --- | --- | --- | --- | --- |
| **CAB (% GDP)** | -7.82 | -2.96 | 8.32 | -35.75 | 6.76 | 246 |
| **Trade Balance (USD)** | -1.44 | -5.46 | 2.45 | -3.60 | 5.45 | 246 |
| **FDI Inflows (% GDP)** | 1.18 | 0.70 | 1.57 | -0.64 | 16.78 | 246 |
| **Remittances (% GDP)** | 3.48 | 3.63 | 2.27 | 0.08 | 10.59 | 246 |
| **Debt Service (USD)** | 5.98 | 3.30 | 3.57 | 8.03 | 9.38 | 246 |
| **GDP per capita (USD)** | 1,925.16 | 992.52 | 2,207.24 | 272.06 | 13,215.54 | 246 |
| **Crisis 2008 (Dummy)** | 0.49 | 0.00 | 0.50 | 0.00 | 1.00 | 246 |
| **Crisis COVID (Dummy)** | 0.14 | 0.00 | 0.35 | 0.00 | 1.00 | 246 |

### **Table 4.2: Country-Level Comparative Statistics (1990-2023)**

**Means (Medians) with Standard Deviations in Brackets**

| **Variable** | **Afghanistan** | **Bangladesh** | **Bhutan** | **India** | **Maldives** | **Pakistan** | **Sri Lanka** |
| --- | --- | --- | --- | --- | --- | --- | --- |
| **CAB (% GDP)** | -15.64 (-17.11) | -0.03 (0.22) | -17.87 (-19.11) | -1.26 (-1.07) | -12.07 (-8.63) | -2.33 (-2.48) | -3.34 (-2.96) |
|  | [7.77] | [1.54] | [9.68] | [1.31] | [9.29] | [2.59] | [2.28] |
| **Trade Balance (USD)** | -5.52 (-5.68) | -9.05 (-5.46) | -4.24 (-4.59) | -4.66 (-3.18) | 2.40 (8.19) | -1.44(-1.28) | -3.34 (-2.29) |
|  | [1.81] | [8.88] | [2.34] | [4.16] | [2.65] | [1.21] | [2.45] |
| **FDI Inflows (% GDP)** | 0.36 (0.27) | 0.59 (0.45) | 1.02 (0.48) | 1.24 (1.06) | 6.69 (6.74) | 0.92 (0.70) | 1.18 (1.13) |
|  | [0.31] | [0.49] | [1.57] | [0.82] | [4.36] | [0.65] | [0.48] |
| **Remittances (% GDP)** | 2.37 (2.04) | 5.65 (5.22) | 1.53 (0.92) | 2.76 (2.94) | 0.27 (0.19) | 4.61 (3.63) | 7.08 (7.43) |
|  | [1.27] | [2.48] | [1.23] | [0.82] | [0.21] | [2.27] | [1.04] |
| **GDP per capita (USD)** | 502.33 (510.79) | 970.63 (537.96) | 2,905.55 (2,954.04) | 1,115.03 (992.52) | 5,909.30 (5,758.10) | 925.48 (963.79) | 2,205.16 (1,578.64) |
|  | [98.67] | [811.80] | [725.09] | [748.84] | [3,942.43] | [424.20] | [1,507.24] |

**Table 4.3: Correlation Matrix with Significance Levels**

| **Variable** | **CAB GDP** | **Fiscal Proxy** | **Trade Balance** | **FDI Inflows** | **Remittances** |
| --- | --- | --- | --- | --- | --- |
| CAB GDP | 1.0000 |  |  |  |  |
| Fiscal Proxy | -0.0637 | 1.0000 |  |  |  |
| Trade Balance | -0.1761* | 0.0390 | 1.0000 |  |  |
| FDI Inflows | -0.3773*** | -0.0431 | 0.0793 | 1.0000 |  |
| Remittances | 0.3654*** | -0.0805 | -0.0038 | -0.2979*** | 1.0000 |

**Table 4.4 : Correlation Matrix with Multi-Level Significance**

| **Variable** | **CAB GDP** | **Trade Balance** | **FDI Inflows** | **Remittances** | **Debt Service** | **GDP pc** | **Crisis 2008** | **Crisis COVID** | **FDI×2008** | **Remit×2008** | **FDI×COVID** | **Remit×**  **COVID** |
| --- | --- | --- | --- | --- | --- | --- | --- | --- | --- | --- | --- | --- |
| CAB GDP | 1.000 |  |  |  |  |  |  |  |  |  |  |  |
| Trade Balance | -0.176* | 1.000 |  |  |  |  |  |  |  |  |  |  |
| FDI Inflows | -0.377* | 0.079 | 1.000 |  |  |  |  |  |  |  |  |  |
| Remittances | 0.365* | -0.004 | -0.298* | 1.000 |  |  |  |  |  |  |  |  |
| Debt Service | -0.268* | 0.050 | 0.079 | -0.156* | 1.000 |  |  |  |  |  |  |  |
| GDP per capita | -0.463* | 0.078 | 0.855* | -0.233* | 0.136* | 1.000 |  |  |  |  |  |  |
| Crisis 2008 | -0.276* | -0.311* | 0.174* | 0.247* | 0.131* | 0.398* | 1.000 |  |  |  |  |  |
| Crisis COVID | -0.159* | -0.164* | 0.050 | 0.117* | -0.099 | 0.254* | 0.396* | 1.000 |  |  |  |  |
| FDI×2008 | -0.379* | 0.015 | 0.932* | -0.211* | 0.116* | 0.859* | 0.376* | 0.130* | 1.000 |  |  |  |
| Remit×2008 | 0.224* | -0.093 | -0.203* | 0.896* | -0.098 | -0.083 | 0.516* | 0.223* | -0.096 | 1.000 |  |  |
| FDI×COVID | -0.247* | 0.029 | 0.526* | -0.112* | -0.043 | 0.549* | 0.170* | 0.429* | 0.556* | -0.059 | 1.000 |  |
| Remit×COVID | 0.057 | -0.088 | -0.122* | 0.460* | -0.064 | 0.002 | 0.253* | 0.639* | -0.069 | 0.511* | 0.026 | 1.000 |

**4.5 Fixed-Effects Regression: Current Account Balance (% of GDP)**

| **Variable** | **Coefficient** | **Robust Std. Err.** | **t-value** | **p-value** | **95% Confidence Interval** |
| --- | --- | --- | --- | --- | --- |
| Fiscal Proxy (Debt svc/cap) | -2.54e-16 | 1.95e-16 | -1.30 | 0.193 | [-6.38e-16, 1.30e-16] |
| Remittances (% GDP) | 0.2497*** | 0.0785 | 3.18 | 0.002 | [0.0950, 0.4044] |
| FDI Inflows (% GDP) | -0.1938 | 0.2753 | -0.70 | 0.482 | [-0.7362, 0.3485] |
| Trade Balance (% GDP) | 1.89e-11 | 2.01e-11 | 0.94 | 0.348 | [-2.07e-11, 5.85e-11] |
| GDP per capita (USD) | -0.0010*** | 0.0003 | -3.32 | 0.001 | [-0.0016, -0.0004] |
| Constant | -4.2038*** | 0.6326 | -6.64 | 0.000 | [-5.4502, -2.9574] |

**4.6 Unit Root Test Results (Im-Pesaran-Shin Test)**

| **Variable (as defined in model)** | **Tested Series** | **W-t-bar Statistic** | **p-value** | **Conclusion (α=0.05)** |
| --- | --- | --- | --- | --- |
| CAB (% GDP) | cab_gdp | -4.6243 | 0.0000 *** | Stationary |
| Trade Balance (% GDP) | trade_balance | -0.5790 | 0.2813 | Non-stationary |
| FDI Inflows (% GDP) | fdi_inflow_gdp | -3.5167 | 0.0002 *** | Stationary |
| Remittances (% GDP) (log in model) | remit_received_gdp | 0.7967 | 0.7872 | Non-stationary |
| Fiscal Proxy (debt service/cap) | debt_service_usd | 1.0582 | 0.8550 | Non-stationary |
| GDP per capita (log in model) | gdp_pc_usd | 5.2506 | 1.0000 | Non-stationary |

Significance levels: ***p<0.01, **p<0.05, *p<0.1

**Table 4.7 : Determinants of Current Account Balance (% GDP) - Comparative Analysis**

| **Variables** | **FE Model (Driscoll-Kraay SE)** | | **RE Model (GLS)** | | **Key Comparisons** |
| --- | --- | --- | --- | --- | --- |
|  | **Coefficient** | **Std. Error** | **Coefficient** | **Std. Error** | **FE vs. RE Differences** |
| **Fiscal Policy** |  |  |  |  |  |
| Fiscal Proxy | -3.29e-14 | 7.22e-14 | 2.85e-14 | 1.27e-13 | Both insignificant |
| **External Sector** |  |  |  |  |  |
| Trade Balance | 2.38e-11 | 1.78e-11 | -9.98e-11*** | 2.00e-11 | Sign reversal |
| FDI Inflows | -0.224 | 0.560 | -0.191 | 0.317 | Both insignificant |
| Remittances | 0.217** | 0.092 | 0.521*** | 0.076 | RE > FE magnitude |
| Debt Service | -2.65e-16 | 3.12e-16 | -6.39e-16** | 2.74e-16 | RE significant |
| **Development Indicator** |  |  |  |  |  |
| GDP per Capita | -0.00102** | 0.00050 | -0.00037 | 0.00040 | Only FE significant |
| Structural Shocks |  |  |  |  |  |
| Global Crisis (2008) | 0.800 | 1.175 | -5.610*** | 1.133 | Opposite effects |
| COVID-19 (2020) | -0.789 | 1.067 | -2.050 | 1.258 | Consistent direction |
| **Model Fit** |  |  |  |  |  |
| Constant | -4.150*** | 0.859 | -4.600*** | 0.731 |  |
| Observations | 246 |  | 246 |  |  |
| Countries | 8 |  | 8 |  |  |
| Within R² | 0.173 |  | 0.105 |  |  |
| Between R² | - |  | 0.820 |  |  |
| Rho (σᵤ) | - |  | 0.000 |  |  |
| F/Wald Test | F (8,34) =10.36*** |  | χ² (5) =N/A |  |  |

**Statistical Significance:** *** p<0.01, ** p<0.05, * p<0.10

**Table 4.8 : Pooled Mean Group (PMG) Estimation Results - ARDL Approach**

| **Variable** | **Long-Run Coefficients** | **Std. Error** | **z-value** | **p-value** | **Short-Run Coefficients** | **Std. Error** | **z-value** | **p-value** |
| --- | --- | --- | --- | --- | --- | --- | --- | --- |
| Trade Balance (% GDP) | 5.25e-11*** | 5.41e-12 | 9.70 | 0.000 | 9.64e-09* | 5.66e-09 | 1.70 | 0.089 |
| FDI Inflows (% GDP) | -0.380* | 0.206 | -1.84 | 0.065 | -0.515** | 0.233 | -2.21 | 0.027 |
| Remittances (% GDP) | 0.973*** | 0.218 | 4.45 | 0.000 | 3.888 | 2.428 | 1.60 | 0.109 |
| Debt Service (USD) | -8.76e-17 | 1.03e-16 | -0.85 | 0.397 | -1.45e-11 | 1.50e-11 | -0.96 | 0.335 |
| GDP per Capita (USD) | 0.00155*** | 0.00027 | 5.74 | 0.000 | 0.00489 | 0.00359 | 1.36 | 0.172 |
| Error Correction Term | -0.154* | 0.086 | -1.78 | 0.075 |  |  |  |  |
| Constant |  |  |  |  | 0.572 | 0.565 | 1.01 | 0.311 |

**Table 4.9.1 : Common Correlated Effects Estimation (CS-ECM) Results**

| **Parameter** | **Short-Run Coefficients** | **Std. Error** | **z-value** | **p-value** | **95% Confidence Interval** |
| --- | --- | --- | --- | --- | --- |
| **Lagged CAB (% GDP)** | 0.115 | 0.097 | 1.18 | 0.237 | [-0.076, 0.305] |
| **Trade Balance (% GDP)** | 8.96e-09* | 5.33e-09 | 1.68 | 0.093 | [-1.49e-09, 1.94e-08] |
| **FDI Inflows (% GDP)** | -0.706 | 0.593 | -1.19 | 0.234 | [-1.868, 0.456] |
| **Remittances (% GDP)** | 1.306*** | 0.445 | 2.93 | 0.003 | [0.433, 2.178] |
| **Adjustment Term** |  |  |  |  |  |
| **Fiscal Proxy** | -2.27e-07 | 2.25e-07 | -1.01 | 0.314 | [-6.69e-07, 2.15e-07] |

**Table 4.9.2 Model Diagnostics & Specifications**

| **Statistic** | **Value** | **Description** |
| --- | --- | --- |
| **Observations** | 238 | Total panel observations |
| **Countries** | 8 | Balanced panel (16-34 obs per country) |
| **R-squared (MG)** | 0.82 | Mean group R-squared |
| **Root MSE** | 2.22 | Root mean squared error |
| **Variables in MG reg.** | 40 | Including cross-sectional averages |
| **Cross-sectional lags** | 0 | Number of lags for CS averages |
| **F-test** | F(64,174)=13.33 (p=0.000) | Overall model significance |

**Table 4.11: Interaction Effects Analysis - Fixed Effects Models**

**Panel A: Remittances/FDI Moderation Effects (H2)**

| Variable | Coeff. | Robust SE | t-stat | p-value | 95% CI |
| --- | --- | --- | --- | --- | --- |
| Fiscal Proxy (FP) | -4.56e-14 | 1.87e-13 | -0.24 | 0.814 | [-4.88e-13, 3.97e-13] |
| Remittances (% GDP) | 0.287*** | 0.085 | 3.37 | 0.012 | [0.086, 0.488] |
| FP × Remittances | 6.46e-15 | 1.57e-13 | 0.04 | 0.968 | [-3.65e-13, 3.78e-13] |
| FDI Inflows (% GDP) | -0.738 | 0.507 | -1.46 | 0.189 | [-1.936, 0.461] |
| FP × FDI | -1.76e-13 | 1.54e-13 | -1.14 | 0.292 | [-5.40e-13, 1.89e-13] |
| Trade Balance (% GDP) | 1.09e-11 | 2.80e-11 | 0.39 | 0.709 | [-5.52e-11, 7.70e-11] |
| Global Crisis (2008) | -1.164 | 2.184 | -0.53 | 0.611 | [-6.327, 4.000] |
| COVID-19 (2020) | -1.570 | 0.962 | -1.63 | 0.147 | [-3.846, 0.706] |

Model Fit:

- Within R² = 0.147
- Between R² = 0.325
- σₑ = 5.122, σᵤ = 6.117
- Rho = 0.588
- Countries = 8, Obs = 246

**Panel B: Structural Break Effects (H3)**

| Variable | Coeff. | Robust SE | t-stat | p-value | 95% CI |
| --- | --- | --- | --- | --- | --- |
| Fiscal Proxy (FP) | -7.87e-14*** | 8.66e-15 | -9.09 | 0.000 | [-9.92e-14, -5.82e-14] |
| Global Crisis (2008) | -1.070 | 2.152 | -0.50 | 0.634 | [-6.159, 4.019] |
| FP × 2008 Crisis | -3.50e-13 | 3.50e-13 | -1.00 | 0.351 | [-1.18e-12, 4.77e-13] |
| COVID-19 (2020) | -2.514* | 1.076 | -2.34 | 0.052 | [-5.058, 0.029] |
| FP × COVID-19 | 1.80e-08* | 7.85e-09 | 2.30 | 0.055 | [-5.38e-10, 3.66e-08] |
| Trade Balance (% GDP) | 2.62e-11 | 2.65e-11 | 0.99 | 0.355 | [-3.64e-11, 8.89e-11] |
| FDI Inflows (% GDP) | -0.714 | 0.498 | -1.43 | 0.195 | [-1.891, 0.464] |
| Remittances (% GDP) | 0.298*** | 0.089 | 3.36 | 0.012 | [0.088, 0.508] |
